# Supplementary material for: Optical properties of regioregular poly(3-hexylthiophene) aggregates from fully atomistic investigations
Source: Royal Society of Chemistry journal article supplement (doi:10.1039/c6ce00645k), 2016-01-01
Supplement: c6ce00645k1.pdf [file c6ce00645k1.pdf]

## ELECTRONIC SUPPLEMENTARY INFORMATION

# Optical Properties of Regioregular Poly(3-hexylthiophene) Aggregates From Fully Atomistic Investigations

*Linjun Wang*\*<sup>a</sup> and *David Beljonne*\*<sup>b</sup>

<sup>a</sup>Department of Chemistry, Zhejiang University, Hangzhou 310027, China

<sup>b</sup>Laboratory for Chemistry of Novel Materials, University of Mons, Place du Parc 20,  
B-7000 Mons, Belgium

\*Email: [ljwang@zju.edu.cn](mailto:ljwang@zju.edu.cn); [david.beljonne@umons.ac.be](mailto:david.beljonne@umons.ac.be)

## Force field details for P3HT in Tinker format:

### 1. Atom type parameters:

```
atom 1 1 C "opls_568 CS C3_thiophene_H " 6 12.011 3
atom 2 2 C "opls_637 CW C2_thiophene_body " 6 12.011 3
atom 3 3 S "opls_633 S S_thiophene " 16 32.060 2
atom 4 4 H "opls_640 HA H3_thiophene " 1 1.008 1
atom 5 5 C "opls_135 CT CH3_alkane " 6 12.011 4
atom 6 6 H "opls_140 HC H_alkane " 1 1.008 1
atom 7 5 C "opls_136 CT CH2_alkane " 6 12.011 4
atom 8 2 C "opls_637 CW C2_thiophene_terminal" 6 12.011 3
atom 9 1 C "opls_568 CS C3_thiophene_alkane " 6 12.011 3
atom 10 4 H "opls_640 HA H2_thiophene_terminal" 1 1.008 1
```

### 2. Van der Waals parameters:

```
vdw 1 3.55000 0.07600
vdw 2 3.55000 0.07000
vdw 3 3.55000 0.25000
vdw 4 2.42000 0.03000
vdw 5 3.50000 0.06600
vdw 6 2.50000 0.03000
```

### 3. Atomic charges:

```
charge 1 -0.094
charge 2 +0.011
charge 3 -0.052
charge 4 +0.109
charge 5 -0.180
charge 6 +0.060
charge 7 -0.120
charge 8 -0.175
charge 9 +0.015
charge 10 +0.186
```

### 4. Bond parameters:

```
bond 1 1 453 1.430
bond 1 2 513 1.392
bond 2 3 291 1.743
bond 1 4 370 1.080
bond 2 4 370 1.080
bond 2 2 394 1.460
bond 1 5 453 1.504
bond 5 6 341 1.112
bond 5 5 323 1.529
```

### 5. Angle parameters:

```
angle 2 1 4 35.25 123.0
angle 2 3 2 86.33 91.6
angle 1 1 2 39.57 110.3
angle 3 2 1 86.33 111.6
angle 3 2 4 28.78 123.0
angle 3 2 2 41.73 120.8
angle 1 2 4 35.25 125.1
angle 1 2 2 54.68 127.7
angle 1 1 4 35.25 124.4
angle 2 1 5 33.81 122.3
```

angle 1 1 5 33.81 122.3  
 angle 5 5 5 49.20 111.0  
 angle 5 5 6 42.45 109.3  
 angle 6 5 6 39.57 107.6  
 angle 1 5 5 38.85 110.6  
 angle 1 5 6 39.57 109.3

6. Improper torsion parameters:

imptors 4 1 1 2 1.100 180.0 2  
 imptors 5 1 1 2 1.100 180.0 2  
 imptors 4 1 2 3 1.100 180.0 2  
 imptors 2 1 2 3 1.100 180.0 2

7. General torsion parameters:

torsion 2 1 5 5 -0.714 0.0 1 0.000 180.0 2 0.000 0.0 3  
 torsion 2 1 5 6 0.000 0.0 1 0.000 180.0 2 -0.480 0.0 3  
 torsion 1 5 5 5 1.300 0.0 1 -0.050 180.0 2 0.200 0.0 3  
 torsion 5 5 5 5 1.300 0.0 1 -0.050 180.0 2 0.200 0.0 3  
 torsion 1 5 5 6 0.000 0.0 1 0.000 180.0 2 0.462 0.0 3  
 torsion 5 5 5 6 0.000 0.0 1 0.000 180.0 2 0.300 0.0 3  
 torsion 6 5 5 6 0.000 0.0 1 0.000 180.0 2 0.300 0.0 3  
 torsion 4 1 2 4 0.000 0.0 1 7.250 180.0 2 0.000 0.0 3  
 torsion 5 1 2 4 0.000 0.0 1 7.250 180.0 2 0.000 0.0 3  
 torsion 4 1 2 3 0.000 0.0 1 7.250 180.0 2 0.000 0.0 3  
 torsion 4 1 1 2 0.000 0.0 1 7.250 180.0 2 0.000 0.0 3  
 torsion 4 1 1 4 0.000 0.0 1 7.250 180.0 2 0.000 0.0 3  
 torsion 4 1 1 5 0.000 0.0 1 7.250 180.0 2 0.000 0.0 3  
 torsion 4 2 3 2 0.000 0.0 1 7.250 180.0 2 0.000 0.0 3  
 torsion 4 2 1 1 0.000 0.0 1 7.250 180.0 2 0.000 0.0 3  
 torsion 2 2 3 2 0.000 0.0 1 7.250 180.0 2 0.000 0.0 3  
 torsion 2 2 1 1 0.000 0.0 1 7.250 180.0 2 0.000 0.0 3  
 torsion 2 2 1 4 0.000 0.0 1 7.250 180.0 2 0.000 0.0 3  
 torsion 2 2 1 5 0.000 0.0 1 7.250 180.0 2 0.000 0.0 3  
 torsion 5 1 1 2 0.000 0.0 1 7.250 180.0 2 0.000 0.0 3  
 torsion 5 1 2 3 0.000 0.0 1 7.250 180.0 2 0.000 0.0 3  
 torsion 3 2 1 1 0.000 0.0 1 7.250 180.0 2 0.000 0.0 3  
 torsion 2 3 2 1 0.000 0.0 1 7.250 180.0 2 0.000 0.0 3  
 torsion 2 1 1 2 0.000 0.0 1 7.250 180.0 2 0.000 0.0 3  
 torsion 1 1 5 6 0.000 0.0 1 0.000 180.0 2 0.000 0.0 3  
 torsion 3 2 2 1 0.000 0.0 1 0.000 0.0 2 0.000 0.0 3  
 torsion 1 2 2 1 0.000 0.0 1 0.000 0.0 2 0.000 0.0 3  
 torsion 1 1 5 5 -0.652944 0.0 1 -0.43181 0.0 2 -0.221361 0.0 3

8. Torsion parameters for  $S_0$ :

torsion 3 2 2 3 -0.15451 0.0 1 -2.40627 0.0 2 0.801493 0.0 4

9. Torsion parameters for  $S_1$ :

torsion 3 2 2 3 -34.3824 0.0 2 6.37882 0.0 4 -2.2659 0.0 6

10. Cutoff parameters:

cutoff 15.0  
 vdw-cutoff 15.0  
 charge-cutoff 15.0

**Figure S1.** (a) Experimental<sup>1</sup> and (b) simulated X-ray diffraction pattern of P3HT crystal. The most obvious scattering peaks located at low angles, namely, (200), (400), and (600), are different order reflections arising from inter-lamella spacing of P3HT thin film. The broad “peak”, (h20)’s, roughly corresponds to an intra-lamella chain-to-chain stacking distance. The three wide angle scattering broad peaks, (hk1)’s, (hk2)’s, and (hk3)’s, reflects the intra-chain repeat unit distance.

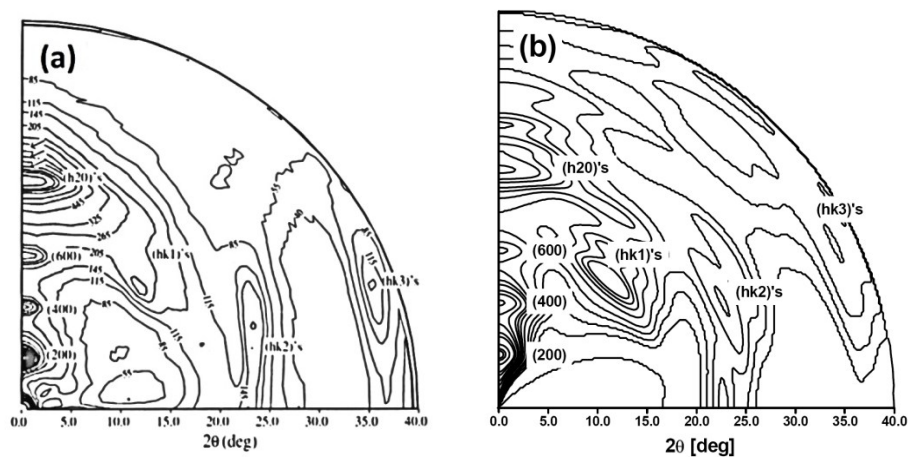

**Figure S2.** (a) Correlation between the lowest transition energies of two chains  $m$  and  $n$  in P3HT aggregate (20, 20). Only the results of the central 18 chains are shown. (b) Averaged correlation as a function of  $|m-n|$  using the central two chains as the reference. The dashed line is an exponential fit to get the correlation length  $l_0$ .

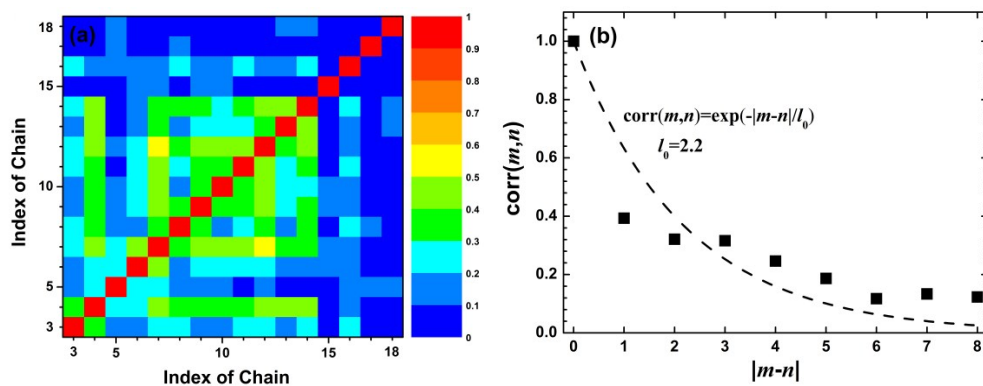

**Table S1.** The chain-length-dependent Huang-Rhys factor ( $S$ ), exciton-phonon coupling constant ( $\lambda$ ), mean first transition energy ( $\langle E \rangle$ ), variance of the first transition energy ( $\sigma_E$ ), mean exciton coupling between the nearest chains ( $\langle J \rangle$ ), and variance of the exciton coupling ( $\sigma_J$ ) for P3HT aggregates  $\{(10, M), M = 10, 15, 20, 25, 30, 35, \text{ and } 40\}$ . The force fields used in the molecular dynamics are based on ground state ( $S_0$ ) or first excited state ( $S_1$ ) torsional potentials as given in parenthesis. All energies are in eV.

| M  | $S$  | $\lambda$ | $\langle E \rangle$<br>( $S_0$ ) | $\sigma_E$<br>( $S_0$ ) | $\langle J \rangle$<br>( $S_0$ ) | $\sigma_J$<br>( $S_0$ ) | $\langle E \rangle$<br>( $S_1$ ) | $\sigma_E$<br>( $S_1$ ) | $\langle J \rangle$<br>( $S_1$ ) | $\sigma_J$<br>( $S_1$ ) |
|----|------|-----------|----------------------------------|-------------------------|----------------------------------|-------------------------|----------------------------------|-------------------------|----------------------------------|-------------------------|
| 10 | 1.02 | 1.01      | 2.270                            | 0.045                   | 0.067                            | 0.0037                  | 2.172                            | 0.014                   | 0.070                            | 0.0013                  |
| 15 | 0.77 | 0.88      | 2.162                            | 0.038                   | 0.042                            | 0.0031                  | 2.081                            | 0.013                   | 0.044                            | 0.0008                  |
| 20 | 0.73 | 0.85      | 2.102                            | 0.030                   | 0.031                            | 0.0030                  | 2.045                            | 0.010                   | 0.030                            | 0.0006                  |
| 25 | 0.64 | 0.80      | 2.085                            | 0.026                   | 0.023                            | 0.0032                  | 2.025                            | 0.009                   | 0.021                            | 0.0006                  |
| 30 | 0.62 | 0.79      | 2.075                            | 0.018                   | 0.015                            | 0.0028                  | 2.012                            | 0.008                   | 0.017                            | 0.0006                  |
| 35 | 0.61 | 0.78      | 2.052                            | 0.015                   | 0.011                            | 0.0029                  | 2.007                            | 0.008                   | 0.013                            | 0.0005                  |
| 40 | 0.59 | 0.77      | 2.057                            | 0.014                   | 0.009                            | 0.0046                  | 2.003                            | 0.007                   | 0.010                            | 0.0006                  |

**Table S2.** Chain-length-dependent energies for the first absorption peak ( $E_{A1}$ ) and the first emission peak ( $E_{0-0}$ ), the calculated Stokes shift (SS), the intensity ratios between the first and second absorption peaks ( $I_{A1}/I_{A2}$ ), the intensity ratios between the first and second emission peaks ( $I_{0-0}/I_{0-1}$ ), and the intensity ratios between the third and the second emission peaks ( $I_{0-2}/I_{0-1}$ ) for P3HT aggregates. The force fields used in the molecular dynamics are based on either purely ground state ( $S_0$ ) torsional potential or a combination of first excited state potential for the central chain and ground state potential for other chains ( $S_{01}$ ) as shown in parenthesis. Calculations using  $S_0$  force field are based on aggregates  $\{(10, M)\}$ , while that adopting  $S_{01}$  force field are based on aggregates  $\{(9, M)\}$ , with  $M = 10, 15, 20, 25, 30, 35,$  and  $40$ . The experimental room-temperature results of nanofiber (NF)<sup>2</sup> and thin film (TF)<sup>3</sup> are also given. All energies are in eV.

| M  | $E_{A1}$<br>( $S_0$ ) | $E_{0-0}$<br>( $S_0$ ) | $E_{0-0}$<br>( $S_{01}$ ) | SS<br>( $S_0$ ) | SS<br>( $S_{01}$ ) | $I_{A1}$<br>$/I_{A2}$<br>( $S_0$ ) | $I_{0-0}$<br>$/I_{0-1}$<br>( $S_0$ ) | $I_{0-0}$<br>$/I_{0-1}$<br>( $S_{01}$ ) | $I_{0-2}$<br>$/I_{0-1}$<br>( $S_0$ ) | $I_{0-2}$<br>$/I_{0-1}$<br>( $S_{01}$ ) |
|----|-----------------------|------------------------|---------------------------|-----------------|--------------------|------------------------------------|--------------------------------------|-----------------------------------------|--------------------------------------|-----------------------------------------|
| 10 | 2.30                  | 2.20                   | 2.14                      | 0.10            | 0.16               | 0.364                              | 0.370                                | 0.716                                   | 0.482                                | 0.448                                   |
| 15 | 2.22                  | 2.13                   | 2.06                      | 0.09            | 0.16               | 0.428                              | 0.404                                | 1.050                                   | 0.369                                | 0.329                                   |
| 20 | 2.15                  | 2.09                   | 2.03                      | 0.06            | 0.12               | 0.535                              | 0.508                                | 1.084                                   | 0.332                                | 0.302                                   |
| 25 | 2.12                  | 2.08                   | 2.02                      | 0.04            | 0.10               | 0.717                              | 0.593                                | 0.953                                   | 0.289                                | 0.271                                   |
| 30 | 2.11                  | 2.08                   | 2.00                      | 0.03            | 0.11               | 0.929                              | 0.843                                | 1.185                                   | 0.271                                | 0.257                                   |
| 35 | 2.07                  | 2.06                   | 2.01                      | 0.01            | 0.06               | 1.014                              | 0.927                                | 1.236                                   | 0.261                                | 0.249                                   |
| 40 | 2.08                  | 2.06                   | 2.00                      | 0.02            | 0.08               | 1.161                              | 1.143                                | 1.458                                   | 0.249                                | 0.237                                   |
| NF | 2.01                  | 1.94                   |                           | 0.07            |                    | 1.015                              | 1.485                                |                                         | ~0.285                               |                                         |
| TF | ~2.07                 | ~1.85                  |                           | ~0.22           |                    | ~0.602                             | ~0.548                               |                                         | 0.452                                |                                         |

## References

1. T. J. Prosa, M. J. Winokur, J. Moulton, P. Smith and A. J. Heeger, *Macromol.*, 1992, **25**, 4364-4372.
2. E. T. Niles, J. D. Roehling, H. Yamagata, A. J. Wise, F. C. Spano, A. J. Moulé and J. K. Grey, *J. Phys. Chem. Lett.*, 2012, **3**, 259-263.
3. J. Clark, C. Silva, R. H. Friend and F. C. Spano, *Phys. Rev. Lett.*, 2007, **98**, 206406.
